# Supplementary material for: The Rhizobia-Lotus Symbioses: Deeply Specific and Widely Diverse
Source: PubMed Central journal article supplement (PMC6144797; doi:10.3389/fmicb.2018.02055), 2018-09-12
Supplement: Image_1.pdf [file Image_1.pdf]

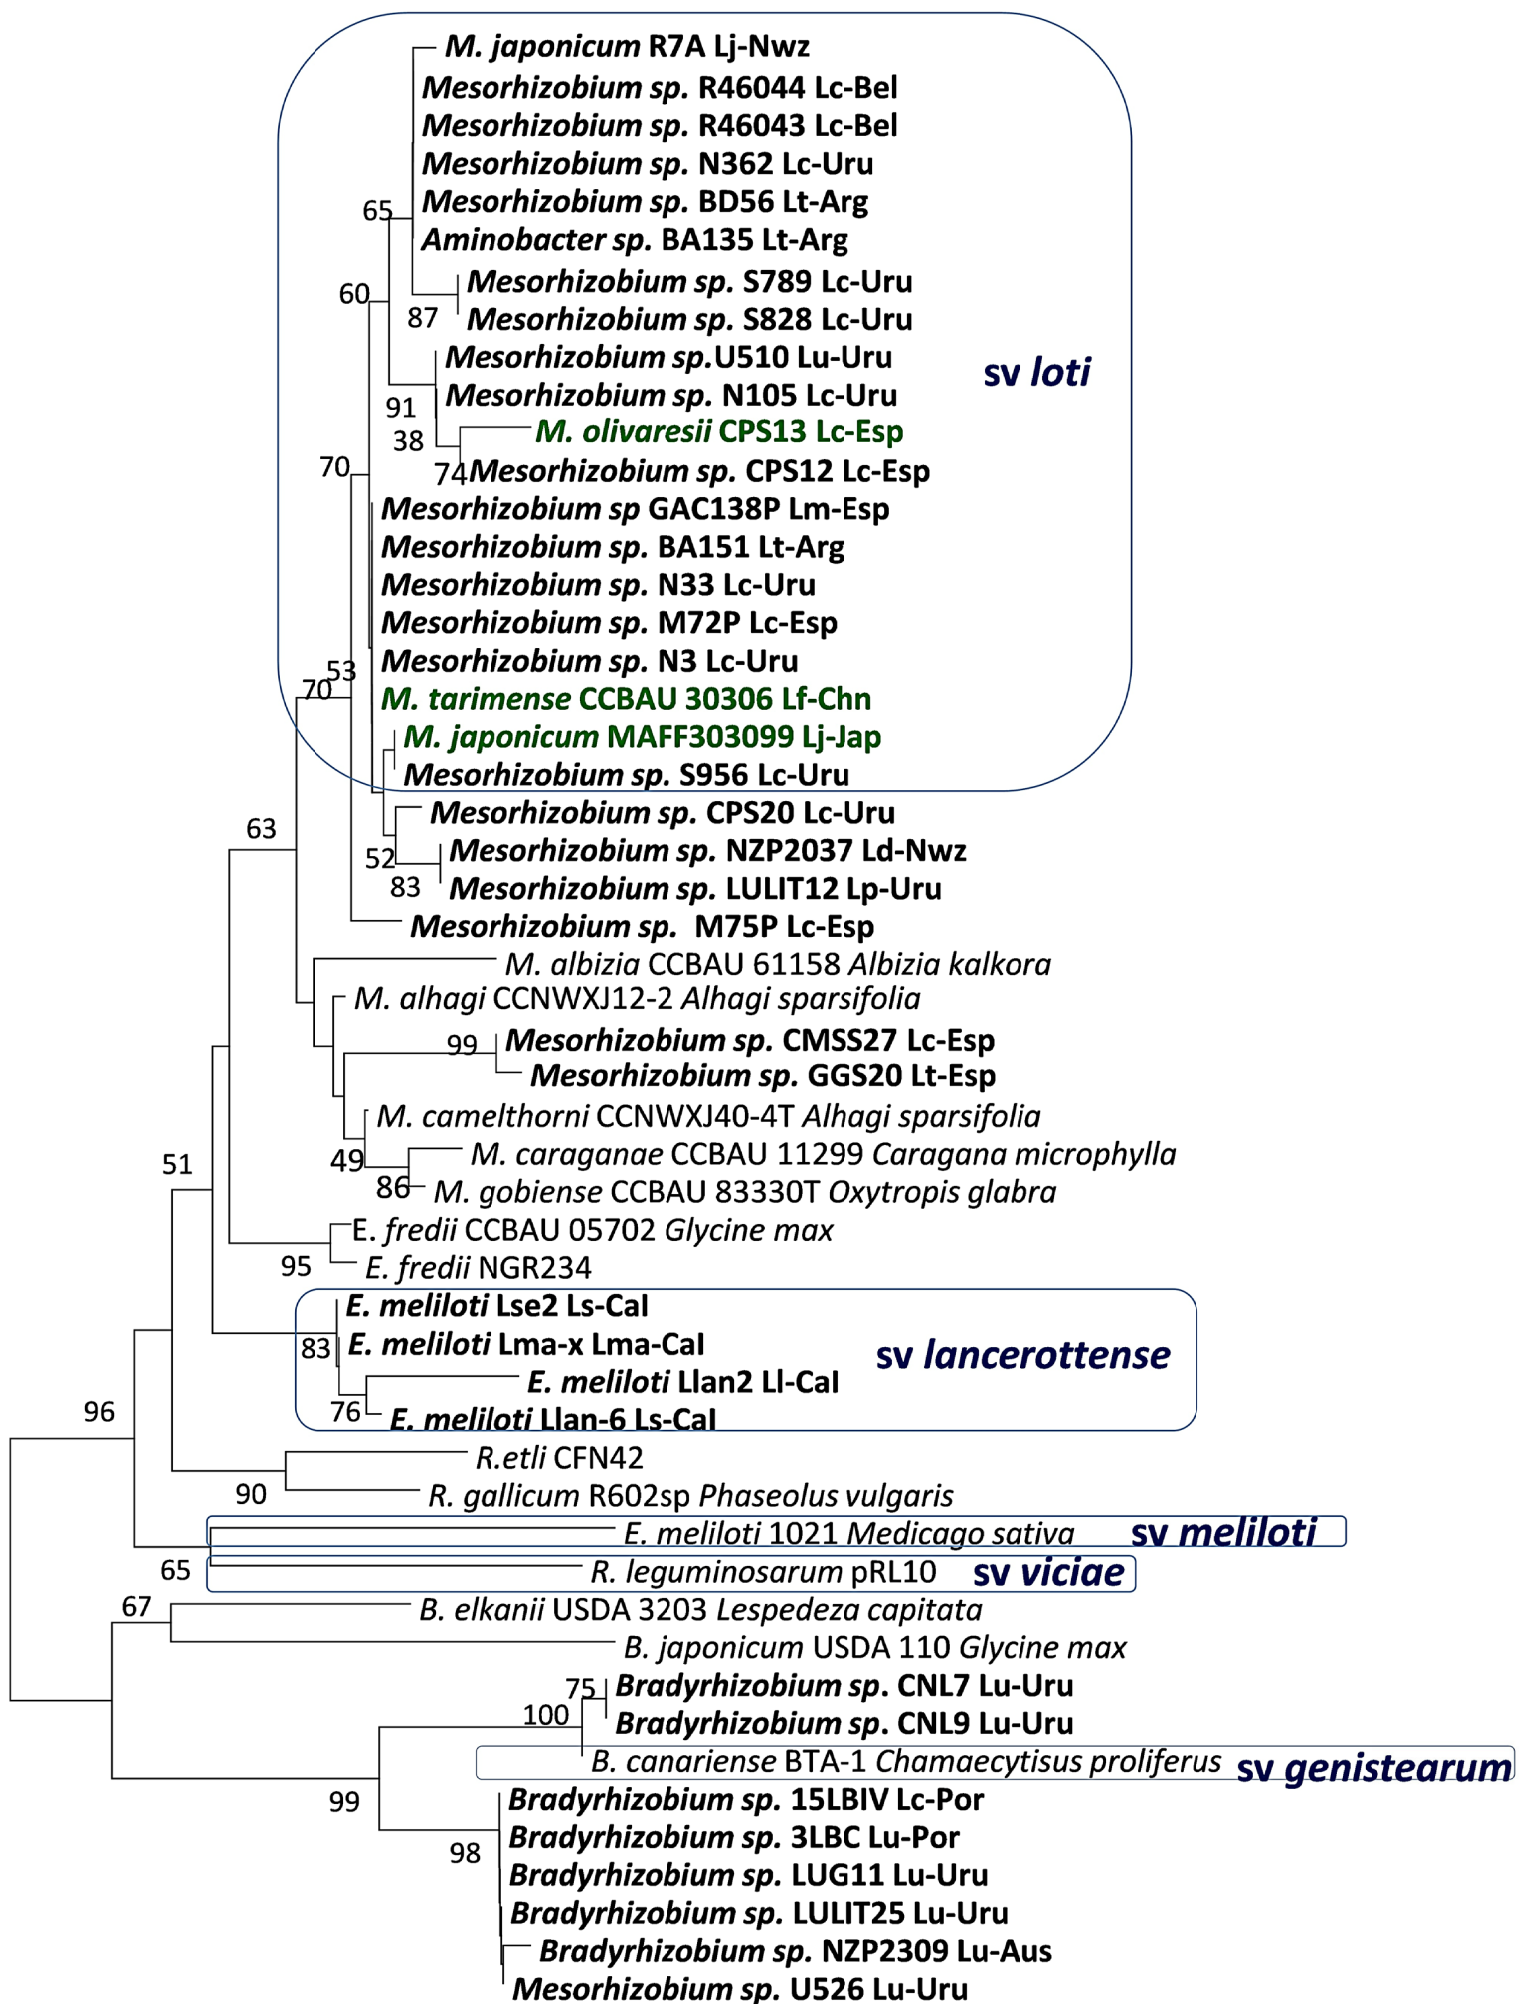

0.01

**Figure S1. Phylogenetic tree of *nifH* gene sequences.** Bold names correspond to *Lotus* rhizobia, with original *Lotus* species and country of isolation indicated. In bold green are rhizobial species which have *Lotus* symbionts as type strains. Previously defined symbiovars are indicated. Strains with unconfirmed symbiotic phenotypes in *Lotus* are marked with an arrow. Analyses were conducted with MEGA using Neighbor Joining Maximum Likelihood (NJML), for a total of 201 positions. Abbreviations are as in Figure 1.
